# Supplementary material
Source: Frontiers journal article supplement (https://www.frontiersin.org/articles/469162)

## Supplementary Material

**Supplementary Figure 1.** **A)** Gating strategy for identification of platelets based on forward scatter intensity and surface expression of CD42b; **B)** Gating strategy for exclusion of platelet-platelet aggregates based on forward scatter intensity and forward scatter peak. **C)** Gating strategy of the negative control of samples with a platelet count  $>15 \times 10^9/L$ ; **D)** Gating strategy of the negative control of samples with a platelet count  $<15 \times 10^9/L$ ; Note the differences in the number of platelets assessed (Number, All) and in the percentage of positive platelets in the gates of the negative controls (%Gated, Bound Fibrinogen); **E)** Determination of platelet pre-activation in a sample with no added agonist; **F)** Expression of bound fibrinogen in a sample stimulated by collagen, applying the gate set using the negative control depicted in C).

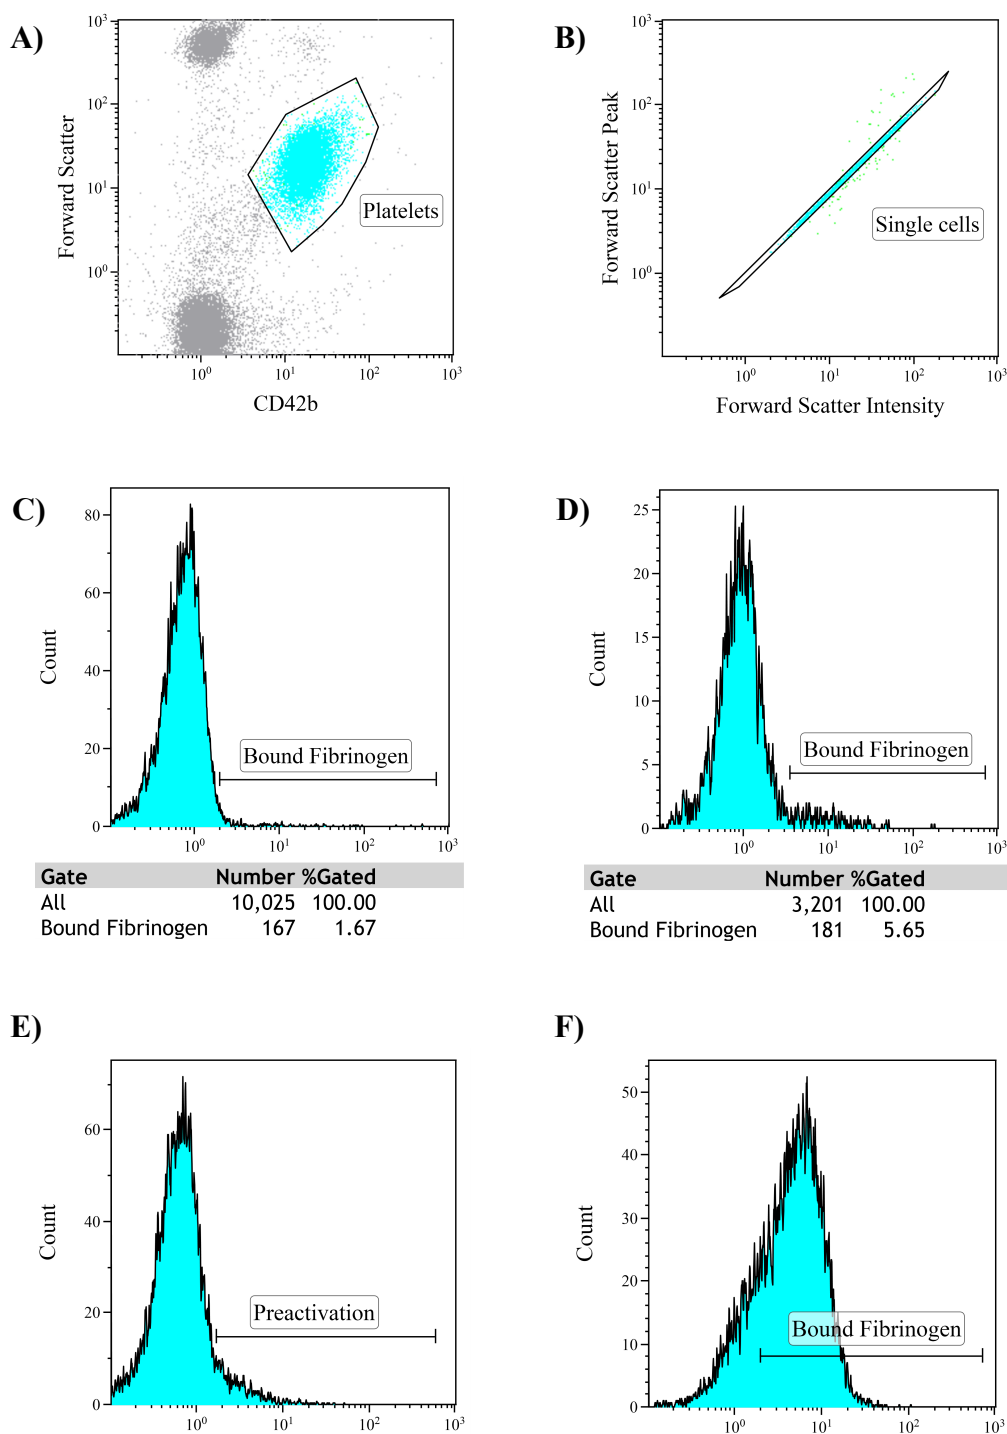

Supplement: Image_1.pdf [file Image_1.pdf]
